# Supplementary material for: Rule–based regulatory and metabolic model for Quorum sensing in P. aeruginosa
Source: PubMed Central journal article supplement (PMC3765737; doi:10.1186/1752-0509-7-81), 2013-08-21
Supplement: 1752-0509-7-81-S1.pdf [file 1752-0509-7-81-S1.pdf]

| Reaction            | Type                                    | Reference                                  |
|---------------------|-----------------------------------------|--------------------------------------------|
| GacA → LasR         | activation, transcription + translation | Reimmann et al. (1997) Mol. Microbiol.     |
| GacA → RhIR         | activation, transcription + translation | Reimmann et al. (1997) Mol. Microbiol.     |
| Vfr → LasR          | activation, transcription + translation | Albus et al. (1997) J Bacteriol.           |
| AI-1 + LasR → C1    | association                             | Seed et al. (1995) J Bacteriol.            |
| C1 → C1:G1          | activation                              | Seed et al. (1995) J Bacteriol.            |
| C1:G1 → LasI        | transcription + translation             | Seed et al. (1995) J Bacteriol.            |
| C1:G1 → RsaL        | transcription + translation             | de Kievit et al. (1999) J Bacteriol.       |
| RsaL → RsaL:G       | activation                              | de Kievit et al. (1999) J Bacteriol.       |
| RsaL:G –  LasI      | inhibition                              | de Kievit et al. (1999) J Bacteriol.       |
| LasI → AI-1         | enzymatic reaction (formation)          | Passador et al. (1993) Science             |
| AI-1 + RhIR → C4    | association                             | Pesci et al. (1997) J Bacteriol.           |
| C1 → C1:G2          | activation                              | Pesci et al. (1997) J Bacteriol.           |
| C1:G2 → RhIR        | transcription + translation             | Pesci et al. (1997) J Bacteriol.           |
| AI-2 –  C4          | blocking                                | Pesci et al. (1997) J Bacteriol.           |
| C1:G2 → RhII        | transcription + translation             | - - - - -                                  |
| AI-2 + RhIR → C2    | association                             | Ochsner and Reiser (1995) PNAS             |
| C2 → C2:G2          | activation                              | Ochsner and Reiser (1995) PNAS             |
| C2:G2 → RhII        | transcription + translation             | Ochsner and Reiser (1995) PNAS             |
| RhII → AI-2         | enzymatic reaction (formation)          | Ochsner and Reiser (1995) PNAS             |
| C1 → C1:G3          | activation                              | Rampioni et al. (2010) Environ. Microbiol. |
| C1:G3 → PqsR        | transcription + translation             | Rampioni et al. (2010) Environ. Microbiol. |
| C1:G3 → PqsH        | transcription + translation             | Rampioni et al. (2010) Environ. Microbiol. |
| HHQ + PqsH → PQS    | enzymatic reaction (formation)          | Deziel et al. (2004) PNAS                  |
| PQS + PqsR → C3     | association                             | Deziel et al. (2004) PNAS                  |
| C3 → C3:G3          | activation                              | Deziel et al. (2004) PNAS                  |
| C3:G3 → PqsABCDE    | transcription + translation             | Deziel et al. (2004) PNAS                  |
| PqsA + PqsBCD → HHQ | enzymatic reaction (formation)          | Deziel et al. (2004) PNAS                  |
| HHQ + PqsR → C5     | association                             | Xiao et al. (2006) Mol. Microbiol.         |
| C5 → C5:G3          | activation                              | Xiao et al. (2006) Mol. Microbiol.         |
| C5:G3 → PqsABCDE    | transcription + translation             | Xiao et al. (2006) Mol. Microbiol.         |
| PqsA → DHQ          | enzymatic reaction (formation)          |                                            |
