# Supplementary material for: Rule–based regulatory and metabolic model for Quorum sensing in P. aeruginosa
Source: PubMed Central journal article supplement (PMC3765737; doi:10.1186/1752-0509-7-81), 2013-08-21
Supplement: 1752-0509-7-81-S2.pdf [file 1752-0509-7-81-S2.pdf]

| Reaction           | Reference                                                                   |
|--------------------|-----------------------------------------------------------------------------|
| C1:G1 → LasB       | Gambello and Iglewski (1991) J Bacteriol.                                   |
| C2:G2 → LasB       | Wilder et al. (2011) ISME J                                                 |
| C3:G3 → LasB       | Wilder et al. (2011) ISME J                                                 |
| C2:G2 → RhlAB      | Ochsner et al. (1994) J Biological Chem.; Medina et al. (2003) J Bacteriol. |
| C2:G2 → RhIC       |                                                                             |
| RhlAB → Rhm1       | Ochsner et al. (1994) J Biological Chem.; Maier and Soberon-Chavez (2000)   |
|                    | Appl Microbiol Biotechnol                                                   |
| Rhm1 + RhIC → Rhm2 | Ochsner et al. (1994) J Biological Chem.; Maier and Soberon-Chavez (2000)   |
|                    | Appl Microbiol Biotechnol                                                   |
| C3:G3 → pyocyanin  |                                                                             |
| PqsE → pyocyanin   |                                                                             |
