# Supplementary material for: Rule–based regulatory and metabolic model for Quorum sensing in P. aeruginosa
Source: PubMed Central journal article supplement (PMC3765737; doi:10.1186/1752-0509-7-81), 2013-08-21
Supplement: 1752-0509-7-81-S3.pdf [file 1752-0509-7-81-S3.pdf]

|       |      |      |           |      |        |        |         |         |          |          |          |          |
|-------|------|------|-----------|------|--------|--------|---------|---------|----------|----------|----------|----------|
| node  | RsaL | LasB | pyocyanin | Rhm2 | HHQ_in | PQS_in | AI-1_in | AI-2_in | HHQ_out  | PQS_out  | AI-1_out | AI-2_out |
| state | 3    | 6    | 6         | 6    | 6      | 6      | 6       | 6       | $\infty$ | $\infty$ | $\infty$ | $\infty$ |
