# Supplementary material for: Rule–based regulatory and metabolic model for Quorum sensing in P. aeruginosa
Source: PubMed Central journal article supplement (PMC3765737; doi:10.1186/1752-0509-7-81), 2013-08-21
Supplement: 1752-0509-7-81-S4.pdf [file 1752-0509-7-81-S4.pdf]

$$K(x, \epsilon) = \begin{cases} 1 & \text{if } x \geq \epsilon \\ 0 & \text{else} \end{cases}$$

$$H(x) = \begin{cases} \lfloor x \rfloor & \text{if } x \geq 0 \\ 0 & \text{else} \end{cases}$$

$$G(x, i) = \begin{cases} x & \text{if maximal possible level of node } i > 1 \\ 0 & \text{else} \end{cases}$$

$$M(x, i) = \begin{cases} x & \text{if maximal possible level of node } i \geq x \\ \text{maximal possible level of node } i & \text{else} \end{cases}$$
