# Supplementary material for: Rule–based regulatory and metabolic model for Quorum sensing in P. aeruginosa
Source: PubMed Central journal article supplement (PMC3765737; doi:10.1186/1752-0509-7-81), 2013-08-21

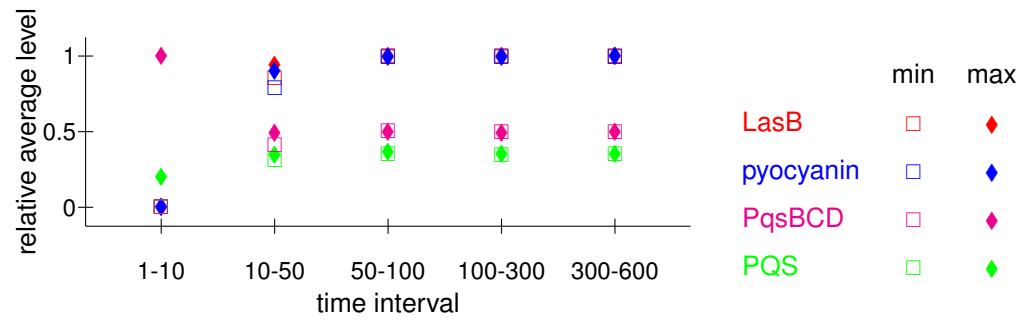

Supplement: 1752-0509-7-81-S7.pdf [file 1752-0509-7-81-S7.pdf]
