# Supplementary material for: Rule–based regulatory and metabolic model for Quorum sensing in P. aeruginosa
Source: PubMed Central journal article supplement (PMC3765737; doi:10.1186/1752-0509-7-81), 2013-08-21
Supplement: 1752-0509-7-81-S8.pdf [file 1752-0509-7-81-S8.pdf]

| time step | HHQ | PQS | C3 | C5 | C3:G3 | C5:G3 | PqsA | PqsBCD | PqsE |
|-----------|-----|-----|----|----|-------|-------|------|--------|------|
| 10        | 0   | 0   | 0  | 0  | 1     | 1     | 0    | 0      | 0    |
| 11        | 1   | 1   | 0  | 0  | 0     | 0     | 1    | 1      | 1    |
| 12        | 2   | 1   | 0  | 0  | 0     | 0     | 0    | 0      | 0    |
| 13        | 2   | 1   | 0  | 0  | 0     | 0     | 0    | 0      | 0    |
| 14        | 2   | 1   | 0  | 0  | 0     | 0     | 0    | 0      | 0    |
| 15        | 2   | 1   | 0  | 0  | 0     | 0     | 0    | 0      | 0    |
| 16        | 0   | 2   | 0  | 1  | 0     | 0     | 0    | 0      | 0    |
| 17        | 0   | 2   | 0  | 0  | 0     | 1     | 0    | 0      | 0    |
| 18        | 1   | 2   | 0  | 0  | 0     | 0     | 1    | 1      | 1    |
| 19        | 2   | 1   | 1  | 0  | 0     | 0     | 0    | 0      | 0    |
| 20        | 0   | 1   | 0  | 1  | 1     | 0     | 0    | 0      | 0    |
| 21        | 0   | 2   | 0  | 0  | 0     | 1     | 1    | 1      | 1    |
| 22        | 2   | 1   | 1  | 0  | 0     | 0     | 1    | 1      | 1    |
| 23        | 2   | 1   | 0  | 1  | 0     | 0     | 0    | 0      | 0    |
| 24        | 0   | 2   | 0  | 1  | 0     | 1     | 0    | 0      | 0    |
| 25        | 1   | 1   | 1  | 0  | 0     | 1     | 1    | 1      | 1    |
| 26        | 2   | 2   | 0  | 0  | 0     | 0     | 1    | 1      | 1    |
| 27        | 1   | 2   | 1  | 0  | 0     | 0     | 0    | 0      | 0    |
| 28        | 0   | 2   | 1  | 0  | 1     | 0     | 0    | 0      | 0    |
| 29        | 0   | 2   | 1  | 0  | 1     | 0     | 1    | 1      | 1    |
| 30        | 1   | 2   | 1  | 0  | 0     | 0     | 1    | 1      | 1    |
| 31        | 1   | 2   | 1  | 0  | 0     | 0     | 0    | 0      | 0    |
| 32        | 0   | 2   | 1  | 0  | 1     | 0     | 0    | 0      | 0    |
| 33        | 0   | 2   | 1  | 0  | 1     | 0     | 1    | 1      | 1    |
| 34        | 1   | 2   | 1  | 0  | 0     | 0     | 1    | 1      | 1    |
| 35        | 2   | 1   | 1  | 0  | 0     | 0     | 0    | 0      | 0    |
| 36        | 1   | 1   | 0  | 1  | 1     | 0     | 0    | 0      | 0    |
| 37        | 1   | 2   | 0  | 0  | 0     | 1     | 1    | 1      | 1    |
| 38        | 2   | 2   | 1  | 0  | 0     | 0     | 1    | 1      | 1    |
| 39        | 1   | 2   | 1  | 0  | 0     | 0     | 0    | 0      | 0    |
| 40        | 0   | 1   | 1  | 0  | 1     | 0     | 0    | 0      | 0    |
| 41        | 0   | 2   | 0  | 0  | 1     | 0     | 1    | 1      | 1    |
| 42        | 1   | 2   | 1  | 0  | 0     | 0     | 1    | 1      | 1    |
| 43        | 2   | 1   | 1  | 0  | 0     | 0     | 0    | 0      | 0    |
| 44        | 1   | 1   | 0  | 1  | 1     | 0     | 0    | 0      | 0    |
| 45        | 0   | 2   | 0  | 0  | 0     | 1     | 1    | 1      | 1    |

|    |   |   |   |   |   |   |   |   |   |
|----|---|---|---|---|---|---|---|---|---|
| 46 | 2 | 2 | 1 | 0 | 0 | 0 | 1 | 1 | 1 |
| 47 | 1 | 2 | 1 | 0 | 0 | 0 | 0 | 0 | 0 |
| 48 | 0 | 2 | 1 | 0 | 1 | 0 | 0 | 0 | 0 |
| 49 | 0 | 2 | 1 | 0 | 1 | 0 | 1 | 1 | 1 |
| 50 | 1 | 2 | 1 | 0 | 0 | 0 | 1 | 1 | 1 |
| 51 | 2 | 1 | 1 | 0 | 0 | 0 | 0 | 0 | 0 |
| 52 | 0 | 2 | 0 | 1 | 1 | 0 | 0 | 0 | 0 |
| 53 | 0 | 2 | 1 | 0 | 0 | 1 | 1 | 1 | 1 |
| 54 | 2 | 1 | 1 | 0 | 0 | 0 | 1 | 1 | 1 |
| 55 | 2 | 1 | 0 | 1 | 0 | 0 | 0 | 0 | 0 |
| 56 | 0 | 2 | 0 | 1 | 0 | 1 | 0 | 0 | 0 |
| 57 | 1 | 1 | 1 | 0 | 0 | 1 | 1 | 1 | 1 |
| 58 | 2 | 1 | 0 | 0 | 0 | 0 | 1 | 1 | 1 |
| 59 | 3 | 1 | 0 | 1 | 0 | 0 | 0 | 0 | 0 |
| 60 | 1 | 1 | 0 | 1 | 0 | 1 | 0 | 0 | 0 |
| 61 | 1 | 2 | 0 | 0 | 0 | 1 | 1 | 1 | 1 |
| 62 | 2 | 1 | 1 | 0 | 0 | 0 | 1 | 1 | 1 |
| 63 | 3 | 1 | 0 | 1 | 0 | 0 | 0 | 0 | 0 |
| 64 | 1 | 2 | 0 | 1 | 0 | 1 | 0 | 0 | 0 |
| 65 | 1 | 2 | 1 | 0 | 0 | 1 | 1 | 1 | 1 |
| 66 | 2 | 2 | 1 | 0 | 0 | 0 | 1 | 1 | 1 |
| 67 | 1 | 2 | 1 | 0 | 0 | 0 | 0 | 0 | 0 |
| 68 | 0 | 2 | 1 | 0 | 1 | 0 | 0 | 0 | 0 |
| 69 | 0 | 2 | 1 | 0 | 1 | 0 | 1 | 1 | 1 |
| 70 | 1 | 2 | 1 | 0 | 0 | 0 | 1 | 1 | 1 |
| 71 | 2 | 1 | 1 | 0 | 0 | 0 | 0 | 0 | 0 |
| 72 | 0 | 2 | 0 | 1 | 1 | 0 | 0 | 0 | 0 |
| 73 | 0 | 2 | 1 | 0 | 0 | 1 | 1 | 1 | 1 |
| 74 | 2 | 1 | 1 | 0 | 0 | 0 | 1 | 1 | 1 |
| 75 | 2 | 1 | 0 | 1 | 0 | 0 | 0 | 0 | 0 |
| 76 | 1 | 1 | 0 | 1 | 0 | 1 | 0 | 0 | 0 |
| 77 | 1 | 2 | 0 | 0 | 0 | 1 | 1 | 1 | 1 |
| 78 | 2 | 1 | 1 | 0 | 0 | 0 | 1 | 1 | 1 |
| 79 | 2 | 1 | 0 | 1 | 0 | 0 | 0 | 0 | 0 |
| 80 | 0 | 1 | 0 | 1 | 0 | 1 | 0 | 0 | 0 |
| 81 | 1 | 1 | 0 | 0 | 0 | 1 | 1 | 1 | 1 |
| 82 | 2 | 2 | 0 | 0 | 0 | 0 | 1 | 1 | 1 |

|     |   |   |   |   |   |   |   |   |   |
|-----|---|---|---|---|---|---|---|---|---|
| 83  | 1 | 2 | 1 | 0 | 0 | 0 | 0 | 0 | 0 |
| 84  | 1 | 1 | 1 | 0 | 1 | 0 | 0 | 0 | 0 |
| 85  | 0 | 2 | 0 | 0 | 1 | 0 | 1 | 1 | 1 |
| 86  | 1 | 3 | 1 | 0 | 0 | 0 | 1 | 1 | 1 |
| 87  | 1 | 2 | 1 | 0 | 0 | 0 | 0 | 0 | 0 |
| 88  | 0 | 3 | 1 | 0 | 1 | 0 | 0 | 0 | 0 |
| 89  | 0 | 2 | 1 | 0 | 1 | 0 | 1 | 1 | 1 |
| 90  | 1 | 3 | 1 | 0 | 0 | 0 | 1 | 1 | 1 |
| 91  | 2 | 2 | 1 | 0 | 0 | 0 | 0 | 0 | 0 |
| 92  | 1 | 1 | 1 | 0 | 1 | 0 | 0 | 0 | 0 |
| 93  | 0 | 2 | 0 | 0 | 1 | 0 | 1 | 1 | 1 |
| 94  | 1 | 2 | 1 | 0 | 0 | 0 | 1 | 1 | 1 |
| 95  | 1 | 2 | 1 | 0 | 0 | 0 | 0 | 0 | 0 |
| 96  | 1 | 1 | 1 | 0 | 1 | 0 | 0 | 0 | 0 |
| 97  | 1 | 2 | 0 | 0 | 1 | 0 | 1 | 1 | 1 |
| 98  | 1 | 2 | 1 | 0 | 0 | 0 | 1 | 1 | 1 |
| 99  | 1 | 3 | 1 | 0 | 0 | 0 | 0 | 0 | 0 |
| 100 | 0 | 2 | 1 | 0 | 1 | 0 | 0 | 0 | 0 |
| 101 | 0 | 2 | 1 | 0 | 1 | 0 | 1 | 1 | 1 |
| 102 | 1 | 2 | 1 | 0 | 0 | 0 | 1 | 1 | 1 |
| 103 | 1 | 2 | 1 | 0 | 0 | 0 | 0 | 0 | 0 |
| 104 | 0 | 2 | 1 | 0 | 1 | 0 | 0 | 0 | 0 |
| 105 | 0 | 2 | 1 | 0 | 1 | 0 | 1 | 1 | 1 |
| 106 | 1 | 2 | 1 | 0 | 0 | 0 | 1 | 1 | 1 |
| 107 | 1 | 2 | 1 | 0 | 0 | 0 | 0 | 0 | 0 |
| 108 | 0 | 2 | 1 | 0 | 1 | 0 | 0 | 0 | 0 |
| 109 | 0 | 2 | 1 | 0 | 1 | 0 | 1 | 1 | 1 |
| 110 | 1 | 2 | 1 | 0 | 0 | 0 | 1 | 1 | 1 |
| 111 | 1 | 2 | 1 | 0 | 0 | 0 | 0 | 0 | 0 |
| 112 | 0 | 2 | 1 | 0 | 1 | 0 | 0 | 0 | 0 |
| 113 | 0 | 3 | 1 | 0 | 1 | 0 | 1 | 1 | 1 |
| 114 | 1 | 2 | 1 | 0 | 0 | 0 | 1 | 1 | 1 |
| 115 | 2 | 2 | 1 | 0 | 0 | 0 | 0 | 0 | 0 |
| 116 | 1 | 1 | 1 | 0 | 1 | 0 | 0 | 0 | 0 |
| 117 | 0 | 2 | 0 | 0 | 1 | 0 | 1 | 1 | 1 |
| 118 | 1 | 3 | 1 | 0 | 0 | 0 | 1 | 1 | 1 |
| 119 | 1 | 2 | 1 | 0 | 0 | 0 | 0 | 0 | 0 |

|     |   |   |   |   |   |   |   |   |   |
|-----|---|---|---|---|---|---|---|---|---|
| 120 | 0 | 1 | 1 | 0 | 1 | 0 | 0 | 0 | 0 |
| 121 | 0 | 2 | 0 | 0 | 1 | 0 | 1 | 1 | 1 |
| 122 | 1 | 3 | 1 | 0 | 0 | 0 | 1 | 1 | 1 |
| 123 | 1 | 2 | 1 | 0 | 0 | 0 | 0 | 0 | 0 |
| 124 | 0 | 2 | 1 | 0 | 1 | 0 | 0 | 0 | 0 |
| 125 | 0 | 2 | 1 | 0 | 1 | 0 | 1 | 1 | 1 |
| 126 | 1 | 2 | 1 | 0 | 0 | 0 | 1 | 1 | 1 |
| 127 | 1 | 2 | 1 | 0 | 0 | 0 | 0 | 0 | 0 |
| 128 | 1 | 1 | 1 | 0 | 1 | 0 | 0 | 0 | 0 |
| 129 | 0 | 2 | 0 | 0 | 1 | 0 | 1 | 1 | 1 |
| 130 | 1 | 2 | 1 | 0 | 0 | 0 | 1 | 1 | 1 |
| 131 | 1 | 2 | 1 | 0 | 0 | 0 | 0 | 0 | 0 |
| 132 | 1 | 1 | 1 | 0 | 1 | 0 | 0 | 0 | 0 |
| 133 | 0 | 2 | 0 | 0 | 1 | 0 | 1 | 1 | 1 |
| 134 | 1 | 2 | 1 | 0 | 0 | 0 | 1 | 1 | 1 |
| 135 | 2 | 1 | 1 | 0 | 0 | 0 | 0 | 0 | 0 |
| 136 | 1 | 1 | 0 | 1 | 1 | 0 | 0 | 0 | 0 |
| 137 | 0 | 2 | 0 | 0 | 0 | 1 | 1 | 1 | 1 |
| 138 | 2 | 1 | 1 | 0 | 0 | 0 | 1 | 1 | 1 |
| 139 | 1 | 2 | 0 | 1 | 0 | 0 | 0 | 0 | 0 |
| 140 | 1 | 0 | 1 | 0 | 0 | 1 | 0 | 0 | 0 |
| 141 | 2 | 0 | 0 | 0 | 1 | 0 | 1 | 1 | 1 |
| 142 | 1 | 2 | 0 | 1 | 0 | 0 | 1 | 1 | 1 |
| 143 | 3 | 1 | 1 | 0 | 0 | 0 | 0 | 0 | 0 |
| 144 | 1 | 2 | 0 | 1 | 1 | 0 | 0 | 0 | 0 |
| 145 | 1 | 2 | 1 | 0 | 0 | 1 | 1 | 1 | 1 |
| 146 | 2 | 2 | 1 | 0 | 0 | 0 | 1 | 1 | 1 |
| 147 | 1 | 2 | 1 | 0 | 0 | 0 | 0 | 0 | 0 |
| 148 | 1 | 1 | 1 | 0 | 1 | 0 | 0 | 0 | 0 |
| 149 | 0 | 2 | 0 | 0 | 1 | 0 | 1 | 1 | 1 |
| 150 | 1 | 2 | 1 | 0 | 0 | 0 | 1 | 1 | 1 |
